# Supplementary material
Source: PubMed Central journal article supplement (PMC3181391)

# Supplemental Figure S1

## A

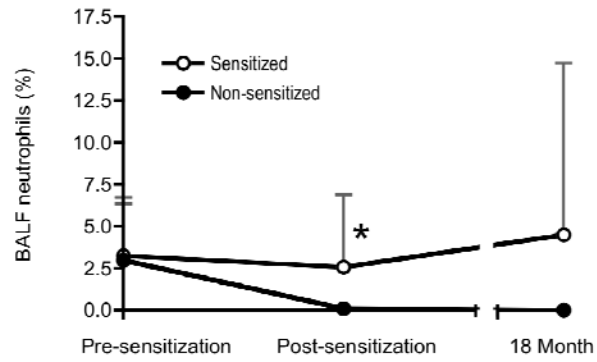

## B

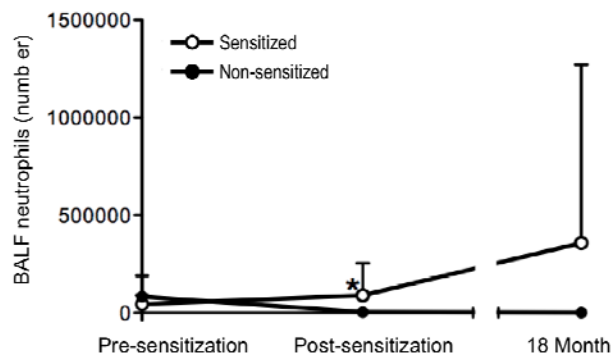

## C

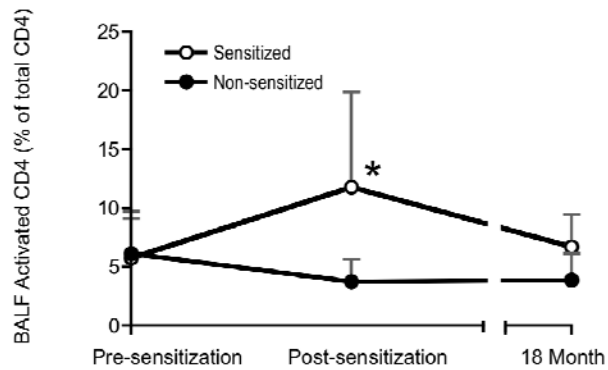

Supplement: mmc1.pdf [file mmc1.pdf]

## Supplemental Figure S2

A

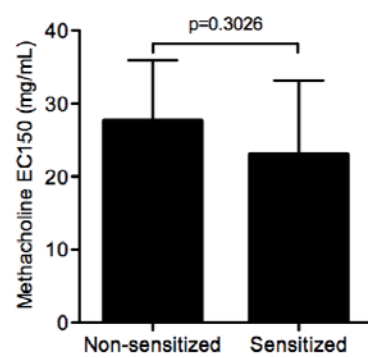

B

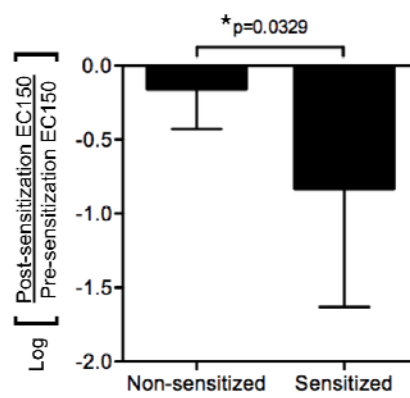

Supplement: mmc2.pdf [file mmc2.pdf]

Supplemental Figure S3

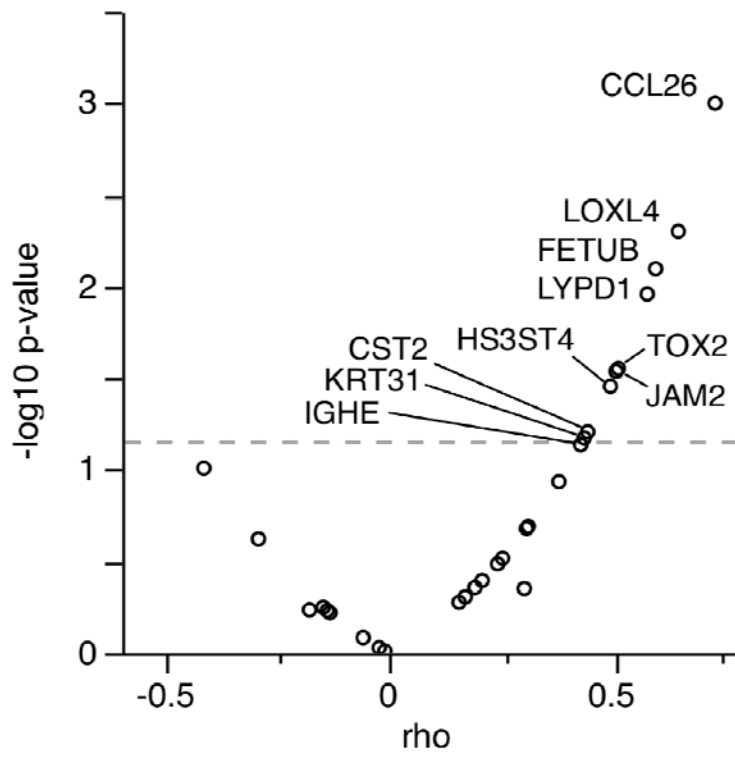

Supplement: mmc3.pdf [file mmc3.pdf]
